# Supplementary material for: Differential regulation of hair cell actin cytoskeleton mediated by SRF and MRTFB
Source: eLife. 2023 Nov 20;12:e90155. doi: 10.7554/eLife.90155 (PMC10703445; doi:10.7554/eLife.90155)
Supplement: Supplementary file 1. [file elife-90155-supp1.xlsx]

## Sheet: Sheet1
Primer sequences used for PCR
Atoh1-cre	Forward	5'-AGTTGAATAACCGGAAATGGTTT
	Reverse	5'-CAATTTCGGCTATACGTAACAGG
Srfflox	Forward	5'-TGCTTACTGGAAAGCTCATGG
	Reverse	5'-TGCTGGTTTGGCATCAACT
Mrtfbflox	Forward	5'-AAAGGCTGGTCAACAGTTGCAGAAG
	Reverse	5'-ACTGCCTTGCACAGAGAAGGCA
Mrtfaflox	Forward	5'-CGGGCTTACCATTAGTGACAGAAGC
	Reverse	5'-TCCATGACTGCCTGGCTTGG
tdTomato WT	Forward	5'-AAGGGAGCTGCAGTGGAGTA
	Reverse	5'-CCGAAAATCTGTGGGAAGTC
tdTomato mutant	Forward	5'-CTGTTCCTGTACGGCATGG
	Reverse	5'-GGCATTAAAGCAGCGTATCC
Primer sequences used for RT-qPCR
Srf	Forward	5'-GGCCGCGTGAAGATCAAGAT
	Reverse	5'-CACATGGCCTGTCTCACTGG
Myo7a	Forward	5'-AGGGGGACTATGTATGGATGGA
	Reverse	5'-ATGTGCGTGGCATTCTGAGG
Actb	Forward	5'-GGCTGTATTCCCCTCCATCG
	Reverse	5'-CCAGTTGGTAACAATGCCATGT
Actg1	Forward	5'-AATCGCCGCACTCGTCATT
	Reverse	5'-CCCTACGATGGAAGGGAACAC
Cfl1	Forward	5'-ATGACATGAAGGTTCGCAAGT
	Reverse	5'-GACAAAAGTGGTGTAGGGGTC
Actr3	Forward	5'-ACTGTGGCACGGGATATACAA
	Reverse	5'-GTCACCCACTTTTGCAGACTC
Myo1e	Forward	5'-CACAGTGGTGTGGACGACAT
	Reverse	5'-GCTTGAATGGGTTGACAGAGATT
Thbs2	Forward	5'-CTGGGCATAGGGCCAAGAG
	Reverse	5'-GCTTGACAATCCTGTTGAGATCA
Ush2a	Forward	5'-ATTACCTGGCTCTCTCACCG
	Reverse	5'-CCTGAAAGCACCCACATTCTC
Htra4	Forward	5'-ACTTGGATGGCGACGTGATTG
	Reverse	5'-GATCAGAGGGGATCGCAAAAG
Camp	Forward	5'-GCTGTGGCGGTCACTATCAC
	Reverse	5'-TGTCTAGGGACTGCTGGTTGA
Kif14	Forward	5'-GGGGCTTAATGAAGAACCAGG
	Reverse	5'-TTCCTCTGCCCATTTTCACCT
Rsf1	Forward	5'-GAGTGTTGAATGCAAACTAGCAC
	Reverse	5'-GACGCATAGTATCAGCATCCTC
Alkbh8	Forward	5'-AGAGTAAAGCCAGGCATGTGT
	Reverse	5'-CCAGGCTCTGAGTGGGATAAG
